# Supplementary material
Source: PubMed Central journal article supplement (PMC8568301)

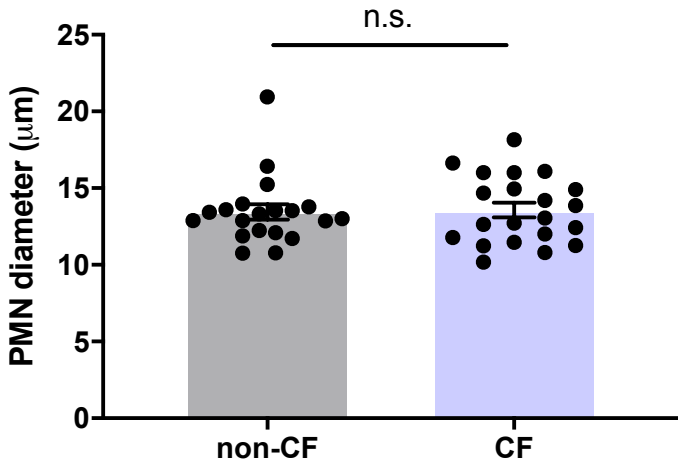

Supplement: NIHMS1673915-supplement-3.pdf [file NIHMS1673915-supplement-3.pdf]
